# Supplementary material for: The Repertoire of RNA Modifications Orchestrates a Plethora of Cellular Responses
Source: MDPI journal article supplement (doi:10.3390/ijms24032387), 2023-01-25
Supplement: s1 [file s1]

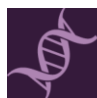

Review

# The Repertoire of RNA Modifications Orchestrates a Plethora of Cellular Responses

Panagiotis G. Adamopoulos \*, Konstantina Athanasopoulou, Glykeria N. Daneva and Andreas Scorilas

**Citation:** Adamopoulos, P.G.; Athanasopoulou, K.; Daneva, G.N.; Scorilas, A. The Repertoire of RNA Modifications Orchestrates a Plethora of Cellular Responses. *Int. J. Mol. Sci.* **2023**, *24*, 2387. <https://doi.org/10.3390/ijms24032387>

Academic Editor: Demetrios A. Arvanitis

Received: 31 December 2022

Revised: 21 January 2023

Accepted: 23 January 2023

Published: 25 January 2023

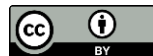

**Copyright:** © 2023 by the authors. Submitted for possible open access publication under the terms and conditions of the Creative Commons Attribution (CC BY) license (<https://creativecommons.org/licenses/by/4.0/>).

Department of Biochemistry and Molecular Biology, Faculty of Biology, National and Kapodistrian University of Athens, 15701 Athens, Greece; [konnath@biol.uoa.gr](mailto:konnath@biol.uoa.gr) (K.A.); [gldaneva@biol.uoa.gr](mailto:gldaneva@biol.uoa.gr) (G.N.D.); [ascorilas@biol.uoa.gr](mailto:ascorilas@biol.uoa.gr) (A.S.)

\* Correspondence: [padamopoulos@biol.uoa.gr](mailto:padamopoulos@biol.uoa.gr); Tel.: +30-210-72-74-686

**Abstract:** Although a plethora of DNA modifications have been extensively investigated in the last decade, recent breakthroughs in molecular biology, including high throughput sequencing techniques, have enabled the identification of post-transcriptional marks that decorate RNAs; hence, epitranscriptomics has arisen. This recent scientific field aims to decode the regulatory layer of the transcriptome and set the ground for the detection of modifications in ribose nucleotides. Until now, more than 170 RNA modifications have been reported in diverse types of RNA that contribute to various biological processes, such as RNA biogenesis, stability, and transcriptional and translational accuracy. However, dysfunctions in the RNA-modifying enzymes that regulate their dynamic level can lead to human diseases and cancer. The present review aims to highlight the epitranscriptomic landscape in human RNAs and match the catalytic proteins with the deposition or deletion of a specific mark. In the current review, the most abundant RNA modifications, such as N6-methyladenosine (m<sup>6</sup>A), N5-methylcytosine (m<sup>5</sup>C), pseudouridine (Ψ) and inosine (I), are thoroughly described, their functional and regulatory roles are discussed and their contributions to cellular homeostasis are stated. Ultimately, the involvement of the RNA modifications and their writers, erasers, and readers in human diseases and cancer is also discussed.

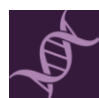

**Supplementary Table S1.** Identified RNA modifications in different types of RNA from different organisms, based on the Modomics database.

| Abbreviations                      | Full Name                                            | Confirmed RNA type                     |
|------------------------------------|------------------------------------------------------|----------------------------------------|
| ac <sup>6</sup> A                  | N6-acetyladenosine                                   | tRNA                                   |
| Am                                 | 2'-O-methyladenosine                                 | mRNA, rRNA, snRNA, snoRNA, tRNA        |
| Ar(p)                              | 2'-O-ribosyladenosine (phosphate)                    | tRNA                                   |
| ct <sup>6</sup> A                  | cyclic N6-threonylcarbamoyladenosine                 | tRNA                                   |
| f <sup>6</sup> A                   | N6-formyladenosine                                   | mRNA                                   |
| g <sup>6</sup> A                   | N6-glycinylicarbamoyladenosine                       | tRNA                                   |
| hm <sup>6</sup> A                  | N6-hydroxymethyladenosine                            | mRNA                                   |
| hn <sup>6</sup> A                  | N6-hydroxynorvalylcarbamoyladenosine                 | tRNA                                   |
| ht <sup>6</sup> A                  | hydroxy-N6-threonylcarbamoyladenosine                | tRNA                                   |
| I                                  | Inosine                                              | mRNA, miRNA, tRNA                      |
| i <sup>6</sup> A                   | N6-isopentenyladenosine                              | tRNA                                   |
| Im                                 | 2'-O-methylinosine                                   | mRNA, tRNA                             |
| io <sup>6</sup> A                  | N6-(cis-hydroxyisopentenyl) adenosine                | tRNA                                   |
| m <sup>1</sup> A                   | 1-methyladenosine                                    | mRNA, lncRNA, rRNA, tRNA               |
| m <sup>1</sup> Am                  | 1,2'-O-dimethyladenosine                             | rRNA, tRNA                             |
| m <sup>1</sup> I                   | 1-methylinosine                                      | tRNA                                   |
| m <sup>1</sup> Im                  | 1,2'-O-dimethylinosine                               | tRNA                                   |
| m <sup>2,8</sup> A                 | 2,8-dimethyladenosine                                | rRNA                                   |
| m <sup>2</sup> A                   | 2-methyladenosine                                    | rRNA, tRNA                             |
| m <sup>6,6</sup> A                 | N6, N6-dimethyladenosine                             | rRNA                                   |
| m <sup>6,6</sup> Am                | N6,N6,2'-O-trimethyladenosine                        | rRNA                                   |
| m <sup>6</sup> A                   | N6-methyladenosine                                   | mRNA, miRNA, lncRNA, rRNA, snRNA, tRNA |
| m <sup>6</sup> Am                  | N6,2'-O-dimethyladenosine                            | snRNA                                  |
| m <sup>6</sup> t <sup>6</sup> A    | N6-methyl-N6-threonylcarbamoyladenosine              | tRNA                                   |
| m <sup>8</sup> A                   | 8-methyladenosine                                    | rRNA                                   |
| ms <sup>2</sup> ct <sup>6</sup> A  | 2-methylthio cyclic N6-threonylcarbamoyladenosine    | tRNA                                   |
| ms <sup>2</sup> hn <sup>6</sup> A  | 2-methylthio-N6-hydroxynorvalylcarbamoyladenosine    | tRNA                                   |
| ms <sup>2</sup> i <sup>6</sup> A   | 2-methylthio-N6-isopentenyladenosine                 | tRNA                                   |
| ms <sup>2</sup> io <sup>6</sup> A  | 2-methylthio-N6-(cis-hydroxyisopentenyl) adenosine   | tRNA                                   |
| ms <sup>2</sup> m <sup>6</sup> A   | 2-methylthio-N6-methyladenosine                      | tRNA                                   |
| ms <sup>2</sup> t <sup>6</sup> A   | 2-methylthio-N6-threonylcarbamoyladenosine           | tRNA                                   |
| msms <sup>2</sup> i <sup>6</sup> A | 2- methylthiomethylenethio-N6-isopentenyl-adenosine  | tRNA                                   |
| pA                                 | adenosine-5'-monophosphate                           |                                        |
| pA2'3'cp                           | adenosine-5'-phosphate-2',3'-cyclic phosphate        |                                        |
| pac <sup>6</sup> A                 | N6-acetyladenosine-5'-monophosphate                  |                                        |
| pAm                                | 2'-O-methyladenosine 5'-(dihydrogen phosphate)       |                                        |
| pAp                                | adenosine-3',5'-diphosphate                          |                                        |
| pAr(p)                             | 2'-O-[(5'-phospho)ribosyl]adenosine-5'-monophosphate |                                        |

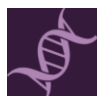

|                                    |                                                                      |                         |
|------------------------------------|----------------------------------------------------------------------|-------------------------|
| pct <sup>6</sup> A                 | cyclic N6-threonylcarbamoyladenosine-5'-monophosphate                |                         |
| pf <sup>6</sup> A                  | N6-formyladenosine-5'-monophosphate                                  |                         |
| pg <sup>6</sup> A                  | N6-glycinylicarbamoyladenosine-5'-monophosphate                      |                         |
| phm <sup>6</sup> A                 | N6-hydroxymethyladenosine-5'-monophosphate                           |                         |
| phn <sup>6</sup> A                 | N6-hydroxynorvalylcarbamoyladenosine-5'-monophosphate                |                         |
| pht <sup>6</sup> A                 | hydroxy-N6-threonylcarbamoyladenosine-5'-monophosphate               |                         |
| pI                                 | inosine-5'-monophosphate                                             |                         |
| pi <sup>6</sup> A                  | N6-isopentenyl-adenosine-5'-monophosphate                            |                         |
| pIm                                | 2'-O-methylinosine-5'-monophosphate                                  |                         |
| pio <sup>6</sup> A                 | N6-(cis-hydroxyisopentenyl)adenosine-5'-monophosphate                |                         |
| pm <sup>1</sup> A                  | 6-hydro-1-methyladenosine-5'-monophosphate                           |                         |
| pm <sup>1</sup> Am                 | 1,2'-O-dimethyladenosine-5'-monophosphate                            |                         |
| pm <sup>1</sup> I                  | 1-methylinosine-5'-monophosphate                                     |                         |
| pm <sup>1</sup> Im                 | 1,2'-O-dimethylinosine-5'-monophosphate                              |                         |
| pm <sup>2,8</sup> A                | 2,8-dimethyladenosine-5'-monophosphate                               |                         |
| pm <sup>2</sup> A                  | 2-methyladenosine-5'-monophosphate                                   |                         |
| pm <sup>6,6</sup> A                | 6N-dimethyladenosine-5'-monophosphate                                |                         |
| pm <sup>6,6</sup> Am               | N6,N6,2'-O-trimethyladenosine-5'-monophosphate                       |                         |
| pm <sup>6</sup> A                  | N6-methyladenosine-5'-monophosphate                                  |                         |
| pm <sup>6</sup> Am                 | N6,2'-O-dimethyladenosine-5'-monophosphate                           |                         |
| pm <sup>6t</sup> A                 | N6-methyl-N6-threonylcarbamoyladenosine-5'-monophosphate             |                         |
| pm <sup>8</sup> A                  | 8-methyladenosine-5'-monophosphate                                   |                         |
| pms <sup>2ct</sup> A               | 2-methylthio cyclic N6-threonylcarbamoyladenosine-5'-monophosphate   |                         |
| pms <sup>2hn</sup> <sup>6</sup> A  | 2-methylthio-N6-hydroxynorvalylcarbamoyladenosine-5'-monophosphate   |                         |
| pms <sup>2i</sup> <sup>6</sup> A   | 2-methylthio-N6-isopentenyl-adenosine-5'-monophosphate               |                         |
| pms <sup>2io</sup> <sup>6</sup> A  | 2-methylthio-N6-(cis-hydroxyisopentenyl) adenosine-5'-monophosphate  |                         |
| pms <sup>2m</sup> <sup>6</sup> A   | 2-methylthio-N6-methyladenosine-5'-monophosphate                     |                         |
| pms <sup>2t</sup> <sup>6</sup> A   | 2-methylthio-N6-threonylcarbamoyladenosine-5'-monophosphate          |                         |
| pmsms <sup>2i</sup> <sup>6</sup> A | 2- methylthiomethylenethio-N6-isopentenyl-adenosine-5'-monophosphate |                         |
| pppA                               | adenosine-5'-triphosphate                                            |                         |
| pt <sup>6</sup> A                  | N6-threonylcarbamoyladenosine-5'-monophosphate                       |                         |
| t <sup>6</sup> A                   | N6-threonylcarbamoyladenosine                                        | tRNA                    |
| xA                                 | unknown modified adenosine                                           | rRNA, tRNA              |
| ac <sup>4</sup> C                  | N4-acetylcytidine                                                    | mRNA, rRNA, tRNA        |
| ac <sup>4</sup> Cm                 | N4-acetyl-2'-O-methylcytidine                                        |                         |
| C+                                 | agmatidine                                                           | tRNA                    |
| Cm                                 | 2'-O-methylcytidine                                                  | mRNA, rRNA, snRNA, tRNA |
| f <sup>5</sup> C                   | 5-formylcytidine                                                     | tRNA                    |
| f <sup>5</sup> Cm                  | 5-formyl-2'-O-methylcytidine                                         | tRNA                    |
| hm <sup>5</sup> C                  | 5-hydroxymethylcytidine                                              | mRNA, rRNA, tRNA        |

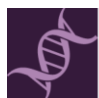

|                                   |                                                                                                                                                 |                                                   |
|-----------------------------------|-------------------------------------------------------------------------------------------------------------------------------------------------|---------------------------------------------------|
| hm <sup>5</sup> Cm                | 2'-O-methyl-5-hydroxymethylcytidine                                                                                                             | snRNA, tRNA                                       |
| ho <sup>5</sup> C                 | 5-hydroxycytidine                                                                                                                               | rRNA                                              |
| k <sup>2</sup> C                  | 2-lysidine                                                                                                                                      | tRNA                                              |
| m <sup>3</sup> C                  | 3-methylcytidine                                                                                                                                | tRNA                                              |
| m <sup>4</sup> , <sup>4</sup> C   | N4, N4-dimethylcytidine                                                                                                                         |                                                   |
| m <sup>4</sup> , <sup>4</sup> Cm  | N4, N4,2'-O-trimethylcytidine                                                                                                                   |                                                   |
| m <sup>4</sup> C                  | N4-methylcytidine                                                                                                                               | rRNA                                              |
| m <sup>4</sup> Cm                 | N4,2'-O-dimethylcytidine                                                                                                                        | rRNA                                              |
| m <sup>5</sup> C                  | 5-methylcytidine                                                                                                                                | mRNA, miRNA, lncRNA, rRNA,<br>snRNA, snoRNA, tRNA |
| m <sup>5</sup> Cm                 | 5,2'-O-dimethylcytidine                                                                                                                         | mRNA, rRNA, tRNA                                  |
| pac <sup>4</sup> C                | N(4)-acetylcytidine-5'-monophosphate                                                                                                            |                                                   |
| pac <sup>4</sup> Cm               | [(2~{R},3~{R},4~{R},5~{R})-5-(4-acetamido-2-oxidanylidene-<br>pyrimidin-1-yl)-4-methoxy-3-oxidanyl-oxolan-2-yl]methyl<br>dihydrogen phosphate   |                                                   |
| pC                                | cytidine-5'-monophosphate                                                                                                                       |                                                   |
| pC+                               | agmatidine-5'-monophosphate                                                                                                                     |                                                   |
| pC2'3'cp                          | cytidine-5'-phosphate-2',3'-cyclic phosphate                                                                                                    |                                                   |
| pCm                               | O2'-methylcytidine-5'-monophosphate                                                                                                             |                                                   |
| pf <sup>5</sup> C                 | 5-formylcytidine 5'-(dihydrogen phosphate)                                                                                                      |                                                   |
| pf <sup>5</sup> Cm                | 5-formyl-2'-O-methylcytidine-5'-monophosphate                                                                                                   |                                                   |
| phm <sup>5</sup> C                | 5-(hydroxymethyl)cytidine 5'-(dihydrogen phosphate)                                                                                             |                                                   |
| phm <sup>5</sup> Cm               | 2'-O-methyl-5-hydroxymethylcytidine-5'-monophosphate                                                                                            |                                                   |
| pho <sup>5</sup> C                | 5-hydroxycytidine-5'-monophosphate                                                                                                              |                                                   |
| pk <sup>2</sup> C                 | 2-lysidine-5'-monophosphate                                                                                                                     |                                                   |
| pm <sup>3</sup> C                 | 3-Methylcytidine- 5'-monophosphate                                                                                                              |                                                   |
| pm <sup>4</sup> , <sup>4</sup> C  | [(2~{R},3~{S},4~{R},5~{R})-5-[4-(dimethylamino)-2-oxidanylidene-<br>pyrimidin-1-yl]-3,4-bis(oxidanyl)oxolan-2-yl]methyl dihydrogen<br>phosphate |                                                   |
| pm <sup>4</sup> , <sup>4</sup> Cm | N4,N4,2'-O-trimethylcytidine-5'-monophosphate                                                                                                   |                                                   |
| pm <sup>4</sup> C                 | 4-methyl, cytidine-5'-monophosphate                                                                                                             |                                                   |
| pm <sup>4</sup> Cm                | 4N,O2'-methylcytidine-5'-monophosphate                                                                                                          |                                                   |
| pm <sup>5</sup> C                 | 5-methylcytidine-5'-monophosphate                                                                                                               |                                                   |
| pm <sup>5</sup> Cm                | 5,2'-O-dimethylcytidine-5'-monophosphate                                                                                                        |                                                   |
| ps <sup>2</sup> C                 | 2-thiocytidine-5'-monophosphate                                                                                                                 |                                                   |
| s <sup>2</sup> C                  | 2-thiocytidine                                                                                                                                  | tRNA                                              |
| xC                                | unknown modified cytidine                                                                                                                       | rRNA, tRNA                                        |
| G+                                | archaeosine                                                                                                                                     | tRNA                                              |
| galQ                              | galactosyl-queuosine                                                                                                                            | tRNA                                              |
| gluQ                              | glutamyl-queuosine                                                                                                                              | tRNA                                              |
| Gm                                | 2'-O-methylguanosine                                                                                                                            | mRNA, rRNA, snRNA, tRNA                           |
| Gr(p)                             | 2'-O-ribosylguanosine (phosphate)                                                                                                               |                                                   |
| imG                               | wyosine                                                                                                                                         | tRNA                                              |
| imG-14                            | 4-demethylwyosine                                                                                                                               |                                                   |
| imG2                              | isowyosine                                                                                                                                      |                                                   |



|                       |                                                             |                         |
|-----------------------|-------------------------------------------------------------|-------------------------|
| m <sup>1</sup> G      | 1-methylguanosine                                           | mRNA, rRNA, tRNA        |
| m <sup>1</sup> Gm     | 1,2'-O-dimethylguanosine                                    |                         |
| m <sup>2,2,7</sup> G  | N2,N2,7-trimethylguanosine                                  |                         |
| m <sup>2,2</sup> G    | N2,N2-dimethylguanosine                                     | mRNA, rRNA, tRNA        |
| m <sup>2,2</sup> Gm   | N2,N2,2'-O-trimethylguanosine                               |                         |
| m <sup>2,7</sup> G    | N2,7-dimethylguanosine                                      |                         |
| m <sup>2,7</sup> Gm   | N2,7,2'-O-trimethylguanosine                                |                         |
| m <sup>2</sup> G      | N2-methylguanosine                                          | rRNA, snRNA, tRNA       |
| m <sup>2</sup> Gm     | N2,2'-O-dimethylguanosine                                   |                         |
| m <sup>7</sup> G      | 7-methylguanosine                                           | mRNA, miRNA, rRNA, tRNA |
| manQ                  | mannosyl-queuosine                                          | tRNA                    |
| mimG                  | methylwyosine                                               |                         |
| o <sub>2</sub> yW     | peroxywybutosine                                            | tRNA                    |
| OHyW                  | hydroxywybutosine                                           |                         |
| OHyWx                 | undermodified hydroxywybutosine                             |                         |
| OHyWy                 | methylated undermodified hydroxywybutosine                  |                         |
| oQ                    | epoxyqueuosine                                              |                         |
| pG                    | guanosine-5'-monophosphate                                  |                         |
| pG+                   | archaeosine-5'-monophosphate                                |                         |
| pG <sub>2'3'</sub> cp | guanoside-5'-phosphate-2',3'-cyclic phosphate               |                         |
| pgalQ                 | galactosyl-queuosine-5'-monophosphate                       |                         |
| pgluQ                 | glutamyl-queuosine-5'-monophosphate                         |                         |
| pGm                   | O2'-methylguanosine-5'-monophosphate                        |                         |
| pGp                   | guanosine-3',5'-diphosphate                                 |                         |
| pGr(p)                | 2'-O-ribosylguanosine (phosphate)-5'-monophosphate          |                         |
| pimG                  | wyosine-5'-monophosphate                                    |                         |
| pimG-14               | 4-demethylwyosine-5'-monophosphate                          |                         |
| pimG <sub>2</sub>     | isowyosine-5'-monophosphate                                 |                         |
| pm <sup>1</sup> G     | 1N-methylguanosine-5'-monophosphate                         |                         |
| pm <sup>1</sup> Gm    | 1,2'-O-dimethylguanosine-5'-monophosphate                   |                         |
| pm <sup>2,2,7</sup> G | N2,N2,7-trimethylguanosine-5'-monophosphate                 |                         |
| pm <sup>2,2</sup> G   | N2-dimethylguanosine-5'-monophosphate                       |                         |
| pm <sup>2,2</sup> Gm  | N2,N2,2'-O-trimethylguanosine-5'-monophosphate              |                         |
| pm <sup>2,7</sup> G   | N2,7-dimethylguanosine-5'-monophosphate                     |                         |
| pm <sup>2,7</sup> Gm  | N2,7,2'-O-trimethylguanosine-5'-monophosphate               |                         |
| pm <sup>2</sup> G     | 2N-methylguanosine-5'-monophosphate                         |                         |
| pm <sup>2</sup> Gm    | N2,2'-O-dimethylguanosine-5'-monophosphate                  |                         |
| pm <sup>7</sup> G     | 7N-methyl-8-hydroguanosine-5'-monophosphate                 |                         |
| pmanQ                 | mannosyl-queuosine-5'-monophosphate                         |                         |
| pmimG                 | methylwyosine-5'-monophosphate                              |                         |
| pOHyW                 | hydroxywybutosine-5'-monophosphate                          |                         |
| pOHyWx                | undermodified hydroxywybutosine-5'-monophosphate            |                         |
| pOHyWy                | methylated undermodified hydroxywybutosine-5'-monophosphate |                         |



|                                      |                                                           |            |
|--------------------------------------|-----------------------------------------------------------|------------|
| poQ                                  | epoxyqueuosine-5'-monophosphate                           |            |
| ppG                                  | guanosine-5'-diphosphate                                  |            |
| pppG                                 | guanosine-5'-triphosphate                                 |            |
| ppreQ0                               | 7-cyano-7-deazaguanosine-5'-monophosphate                 |            |
| ppreQ1                               | 7-aminomethyl-7-deazaguanosine-5'-monophosphate           |            |
| pQ                                   | queuosine-5'-monophosphate                                |            |
| preQ0                                | 7-cyano-7-deazaguanosine                                  |            |
| preQ0base                            | 7-cyano-7-carbaguanine                                    |            |
| preQ1                                | 7-aminomethyl-7-deazaguanosine                            | tRNA       |
| preQ1base                            | 7-aminomethyl-7-carbaguanine                              |            |
| pyW                                  | wybutosine-5'-monophosphate                               |            |
| pyW-58                               | 7-aminocarboxypropylwyosine methyl ester-5'-monophosphate |            |
| pyW-72                               | 7-aminocarboxypropylwyosine-5'-monophosphate              |            |
| pyW-86                               | 7-aminocarboxypropyl-demethylwyosine-5'-monophosphate     |            |
| Q                                    | queuosine                                                 | tRNA       |
| Qbase                                | queuine                                                   |            |
| xG                                   | unknown modified guanosine                                | rRNA, tRNA |
| yW                                   | wybutosine                                                | rRNA, tRNA |
| yW-58                                | 7-aminocarboxypropylwyosine methyl ester                  |            |
| yW-72                                | 7-aminocarboxypropylwyosine                               |            |
| yW-86                                | 7-aminocarboxypropyl-demethylwyosine                      |            |
| acp <sup>3</sup> D                   | 3-(3-amino-3-carboxypropyl)-5,6-dihydrouridine            | tRNA       |
| acp <sup>3</sup> U                   | 3-(3-amino-3-carboxypropyl)uridine                        | rRNA, tRNA |
| acp <sup>3</sup> Ψ                   | 3-(3-amino-3-carboxypropyl)pseudouridine                  |            |
| chm <sup>5</sup> U                   | 5-carboxyhydroxymethyluridine                             |            |
| cm <sup>5</sup> s <sup>2</sup> U     | 5-carboxymethyl-2-thiouridine                             |            |
| cm <sup>5</sup> U                    | 5-carboxymethyluridine                                    |            |
| cmnm <sup>5</sup> ges <sup>2</sup> U | 5-carboxymethylaminomethyl-2-geranylthiouridine           | tRNA       |
| cmnm <sup>5</sup> s <sup>2</sup> U   | 5-carboxymethylaminomethyl-2-thiouridine                  | tRNA       |
| cmnm <sup>5</sup> se <sup>2</sup> U  | 5-carboxymethylaminomethyl-2-selenouridine                |            |
| cmnm <sup>5</sup> U                  | 5-carboxymethylaminomethyluridine                         | tRNA       |
| cmnm <sup>5</sup> Um                 | 5-carboxymethylaminomethyl-2'-O-methyluridine             | tRNA       |
| cmo <sup>5</sup> U                   | uridine 5-oxyacetic acid                                  | tRNA       |
| cnm <sup>5</sup> U                   | 5-cyanomethyluridine                                      |            |
| D                                    | dihydrouridine                                            | rRNA, tRNA |
| ges <sup>2</sup> U                   | 2-geranylthiouridine                                      |            |
| ho <sup>5</sup> U                    | 5-hydroxyuridine                                          |            |
| inm <sup>5</sup> s <sup>2</sup> U    | 5-(isopentenylaminomethyl)-2-thiouridine                  |            |
| inm <sup>5</sup> U                   | 5-(isopentenylaminomethyl)uridine                         |            |
| inm <sup>5</sup> Um                  | 5-(isopentenylaminomethyl)-2'-O-methyluridine             |            |
| m <sup>1</sup> acp <sup>3</sup> Ψ    | 1-methyl-3-(3-amino-3-carboxypropyl)pseudouridine         | rRNA       |
| m <sup>1</sup> Ψ                     | 1-methylpseudouridine                                     | rRNA, tRNA |
| m <sup>3</sup> U                     | 3-methyluridine                                           | rRNA, tRNA |
| m <sup>3</sup> Um                    | 3,2'-O-dimethyluridine                                    |            |



|                                       |                                                                  |            |
|---------------------------------------|------------------------------------------------------------------|------------|
| m <sup>3</sup> Ψ                      | 3-methylpseudouridine                                            | rRNA       |
| m <sup>5</sup> D                      | 5-methyldihydrouridine                                           |            |
| m <sup>5</sup> s <sup>2</sup> U       | 5-methyl-2-thiouridine                                           | tRNA       |
| m <sup>5</sup> U                      | 5-methyluridine                                                  | rRNA, tRNA |
| m <sup>5</sup> Um                     | 5,2'-O-dimethyluridine                                           | tRNA       |
| mchm <sup>5</sup> U                   | 5-(carboxyhydroxymethyl)uridine methyl ester                     | tRNA       |
| mchm <sup>5</sup> Um                  | 5-(carboxyhydroxymethyl)-2'-O-methyluridine methyl ester         |            |
| mcm <sup>5</sup> s <sup>2</sup> U     | 5-methoxycarbonylmethyl-2-thiouridine                            | tRNA       |
| mcm <sup>5</sup> U                    | 5-methoxycarbonylmethyluridine                                   | tRNA       |
| mcm <sup>5</sup> Um                   | 5-methoxycarbonylmethyl-2'-O-methyluridine                       | tRNA       |
| mcmo <sup>5</sup> U                   | uridine 5-oxyacetic acid methyl ester                            | tRNA       |
| mcmo <sup>5</sup> Um                  | 2'-O-methyluridine 5-oxyacetic acid methyl ester                 |            |
| mnm <sup>5</sup> ges <sup>2</sup> U   | 5-methylaminomethyl-2-geranylthiouridine                         | tRNA       |
| mnm <sup>5</sup> s <sup>2</sup> U     | 5-methylaminomethyl-2-thiouridine                                | tRNA       |
| mnm <sup>5</sup> se <sup>2</sup> U    | 5-methylaminomethyl-2-selenouridine                              | tRNA       |
| mnm <sup>5</sup> U                    | 5-methylaminomethyluridine                                       | tRNA       |
| mo <sup>5</sup> U                     | 5-methoxyuridine                                                 | tRNA       |
| nchm <sup>5</sup> U                   | 5-carbamoylhydroxymethyluridine                                  |            |
| ncm <sup>5</sup> s <sup>2</sup> U     | 5-carbamoylmethyl-2-thiouridine                                  |            |
| ncm <sup>5</sup> U                    | 5-carbamoylmethyluridine                                         | tRNA       |
| ncm <sup>5</sup> Um                   | 5-carbamoylmethyl-2'-O-methyluridine                             |            |
| nm <sup>5</sup> ges <sup>2</sup> U    | 5-aminomethyl-2-geranylthiouridine                               |            |
| nm <sup>5</sup> s <sup>2</sup> U      | 5-aminomethyl-2-thiouridine                                      |            |
| nm <sup>5</sup> se <sup>2</sup> U     | 5-aminomethyl-2-selenouridine                                    |            |
| nm <sup>5</sup> U                     | 5-aminomethyluridine                                             |            |
| pacp <sup>3</sup> D                   | 3-(3-amino-3-carboxypropyl)-5,6-dihydrouridine-5'-monophosphate  |            |
| pacp <sup>3</sup> U                   | 3-(3-amino-3-carboxypropyl)uridine-5'-monophosphate              |            |
| pchm <sup>5</sup> U                   | 5-carboxyhydroxymethyluridine-5'-monophosphate                   |            |
| pcm <sup>5</sup> s <sup>2</sup> U     | 5-carboxymethyl-2-thiouridine-5'-monophosphate                   |            |
| pcm <sup>5</sup> U                    | 5-carboxymethyluridine-5'-monophosphate                          |            |
| pcmnm <sup>5</sup> ges <sup>2</sup> U | 5-carboxymethylaminomethyl-2-geranylthiouridine-5'-monophosphate |            |
| pcmnm <sup>5</sup> s <sup>2</sup> U   | 5-carboxymethylaminomethyl-2-thiouridine-5'-monophosphate        |            |
| pcmnm <sup>5</sup> se <sup>2</sup> U  | 5-carboxymethylaminomethyl-2-selenouridine-5'-monophosphate      |            |
| pcmnm <sup>5</sup> U                  | 5-carboxymethylaminomethyluridine-5'-monophosphate               |            |
| pcmnm <sup>5</sup> Um                 | 5-carboxymethylaminomethyl-2'-O-methyluridine-5'-monophosphate   |            |
| pcmo <sup>5</sup> U                   | 5-(carboxymethoxy) uridine-5'-monophosphate                      |            |
| pcnm <sup>5</sup> U                   | 5-cyanomethyluridine-5'-monophosphate                            |            |
| pD                                    | 5,6-dihydrouridine-5'-monophosphate                              |            |
| pges <sup>2</sup> U                   | 2-geranylthiouridine-5'-monophosphate                            |            |
| pho <sup>5</sup> U                    | 5-hydroxyuridine-5'-monophosphate                                |            |
| pinm <sup>5</sup> s <sup>2</sup> U    | 5-(isopentenylaminomethyl)-2-thiouridine-5'-monophosphate        |            |



|                                    |                                                                    |                                        |
|------------------------------------|--------------------------------------------------------------------|----------------------------------------|
| pinm <sup>5</sup> U                | 5-(isopentenylaminomethyl)uridine-5'-monophosphate                 |                                        |
| pinm <sup>5</sup> Um               | 5-(isopentenylaminomethyl)-2'-O-methyluridine-5'-monophosphate     |                                        |
| pm <sup>1</sup> acp <sup>3</sup> Ψ | 1-methyl-3-(3-amino-3-carboxypropyl)pseudouridine-5'-monophosphate |                                        |
| pm <sup>1</sup> Ψ                  | 1-methylpseudouridine-5'-monophosphate                             |                                        |
| pm <sup>3</sup> U                  | 3-methyluridine-5'-monophosphate                                   |                                        |
| pm <sup>3</sup> Um                 | 3,2'-O-dimethyluridine-5'-monophosphate                            |                                        |
| pm <sup>3</sup> Ψ                  | 3-methylpseudouridine-5'-monophosphate                             |                                        |
| pm <sup>5</sup> D                  | 5-methyldihydrouridine-5'-monophosphate                            |                                        |
| m <sup>5</sup> D                   | 5-methyldihydrouridine                                             |                                        |
| ps <sup>4</sup> U                  | 4-thiouridine-5'-monophosphate                                     |                                        |
| s <sup>4</sup> U                   | 4-thiouridine                                                      | tRNA                                   |
| pD                                 | 5,6-dihydrouridine-5'-monophosphate                                |                                        |
| pΨ                                 | pseudouridine-5'-monophosphate                                     |                                        |
| Ψ                                  | pseudouridine                                                      | mRNA, miRNA, rRNA, snRNA, snoRNA, tRNA |
| ?U                                 | unknown modified uridine                                           | rRNA, snRNA, tRNA                      |
| U                                  | uridine                                                            | rRNA, tRNA                             |
